# Supplementary material
Source: MDPI journal article supplement (https://www.mdpi.com/2072-4292/7/11/15179)
Supplement: s1 [file s1]

Supplementary Materials

Topography is meshed with planar triangular elements (Figure S5). For the mesh extent to have a negligible influence on computed displacements (less than 2% [34])*,* the extension of the topographic mesh is about ten times larger than the horizontal extent of the deformation sources*.* The topographic mesh’s node density is fine close to the deformation sources and becomes coarser with distance.

Dikes and magma reservoirs are also meshed with planar triangular elements. Dikes connected to the topography are quadrangles. Their upper part follows the eruptive fracture and their lower part is defined as a straight line characterized by six parameters (Figure S4) [30,39]. Three parameters specify the location of the base line middle point: Botelv (elevation of the base line middle point), Dip (dip angle), and Shear (angle between the line connecting the midpoints of the dike top and base, and the dip). Three other parameters define the location of the two ending points of the base: Botlen (length of the base scaled to that of the top part), Botang (vertical angle of the base), and Twist (horizontal angle between the top and base). The Laccoliths have a domed shape and their geometrical parameters (Figure S8) are: position of the center of the bottom ellipsoid (X,Y,Z), lengths of the long and short axes of the ellipsoid and height (Height) [36]*.*

The source geometries are inverted simultaneously with the pressures with a near-neigborhood algorithm*.* There is first a search [35] and second an appraisal [41] stage. A misfit function defines the discrepancy between modeled and observed displacements [35]:

|  | (S1) |
| --- | --- |

where ***uo***and ***uc*** are vectors of observed and modeled line-of-sight displacements, respectively. ***Cd*** is the data covariance matrix. The offset of each unwrapped dataset is calculated for each forward model by minimizing the misfit [31]*.* Following Wauthier *et al.* [20,31] and Fukushima *et al.* [30], we used an exponential function to account for the noise and 10−4 and 300 m for typical values of the noise variance and correlation distance, respectively.

In the search stage of the inversion [35], user-defined parameter limits explore the model space.
200 initial acceptable models are chosen randomly with their corresponding misfits calculated. In the next iteration, 30 new models are created in the neighborhood (Voronoi cell) of the 30 lowest-misfit models, and misfits for these new models are calculated. Iterations stop when the misfit is no longer lowered significantly. Typical inversions lead to a calculation of ~1000 to 10,000 forward models.

In the appraisal stage of the inversion [41], posterior probability density functions (PPDs) are generated using misfit values calculated during the search. Model parameters’ confidence intervals are calculated from the one-dimensional marginal PPDs (Figure S6). Potential trade-offs between model parameters are shown by the two-dimensional marginal PPDs. The applicability of the method has been confirmed by synthetic tests [30].

To compare inversion results with physically meaningful characteristics, we introduce an RMS error and a percentage of explained data. The RMS error is expressed in centimeters and defined as:

|  | (S2) |
| --- | --- |

where *N* is the number of subsampled data points.

The percentage of explained data is defined as:

|  | (S3) |
| --- | --- |

where uio and uim are i-th elements of and , respectively, and off is a constant offset of the InSAR data minimizing S [31].

Supplementary Figures


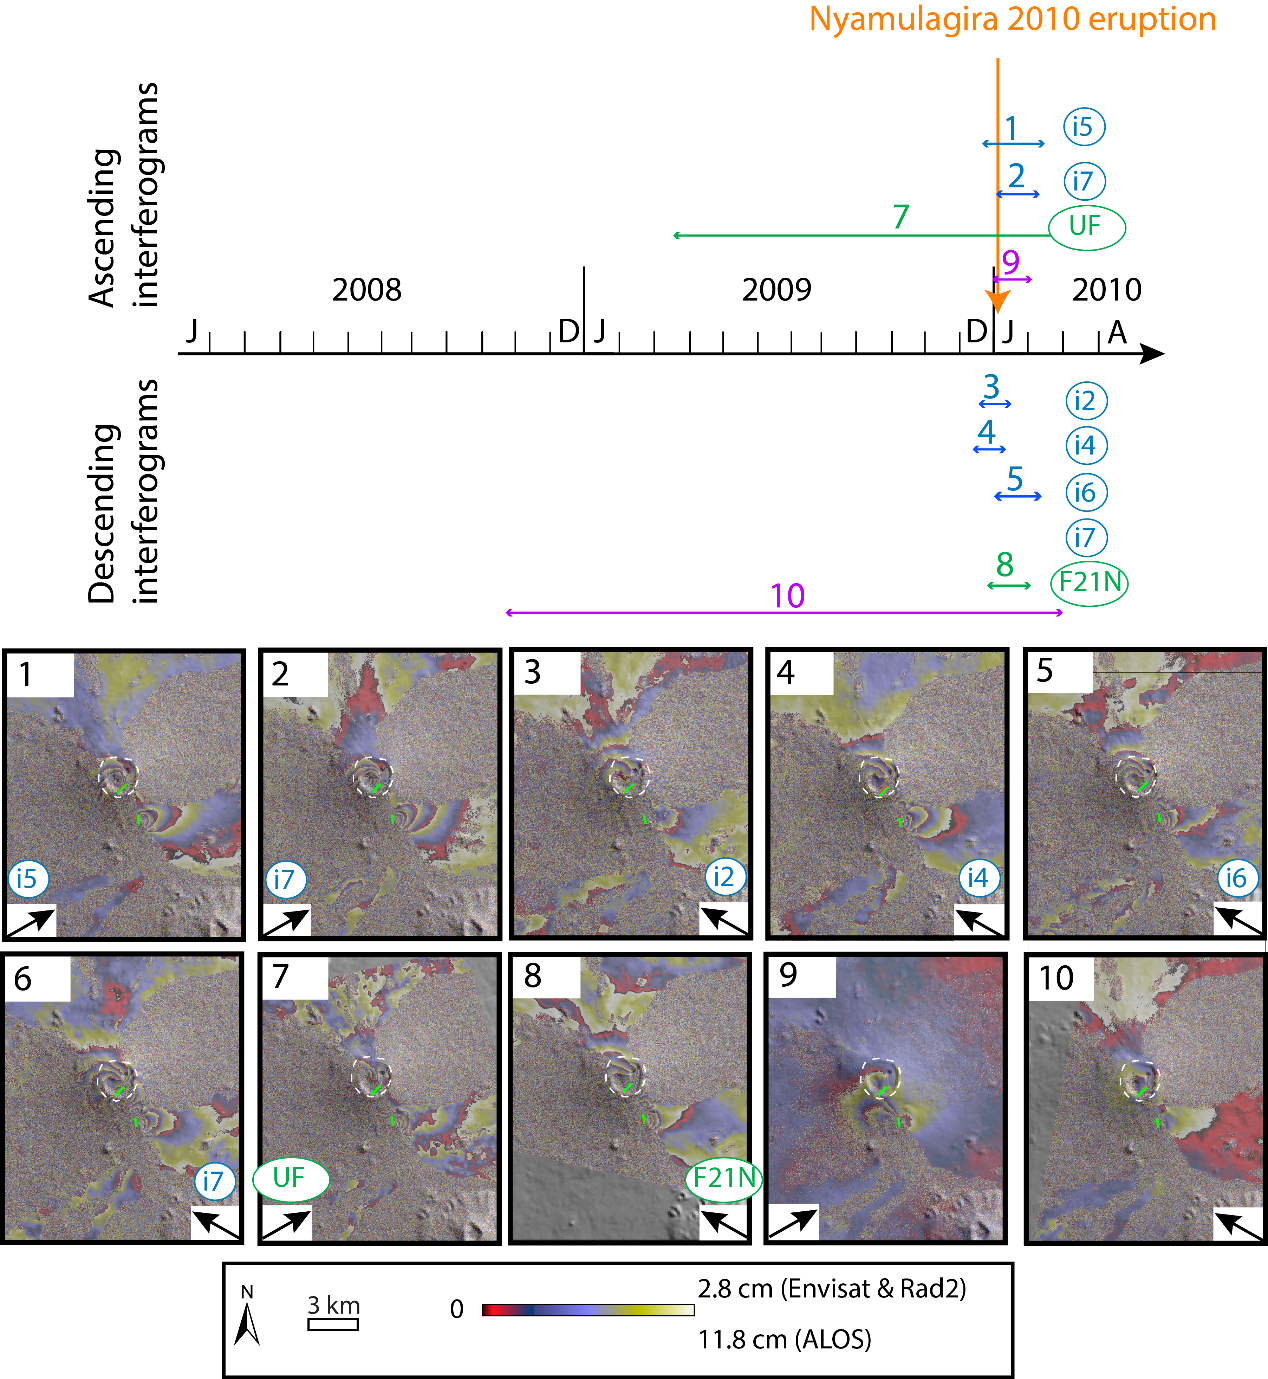


**Figure S1.** Wrapped interferograms covering the 2010 Nyamulagira eruption. Note that i#, F21N and UF denote ENVISAT beam number, RADARSAT-2 Fine mode and beam number and RADARSAT-2 Ultra-Fine mode, respectively. Eruptive fissures are shown as bold green lines and Nyamulagira’s summit caldera is outlined with a dashed white line. Modified from [20]. Interferograms #1, 2, 5 and 9 are shown in Figure 2 and used in the inversions.


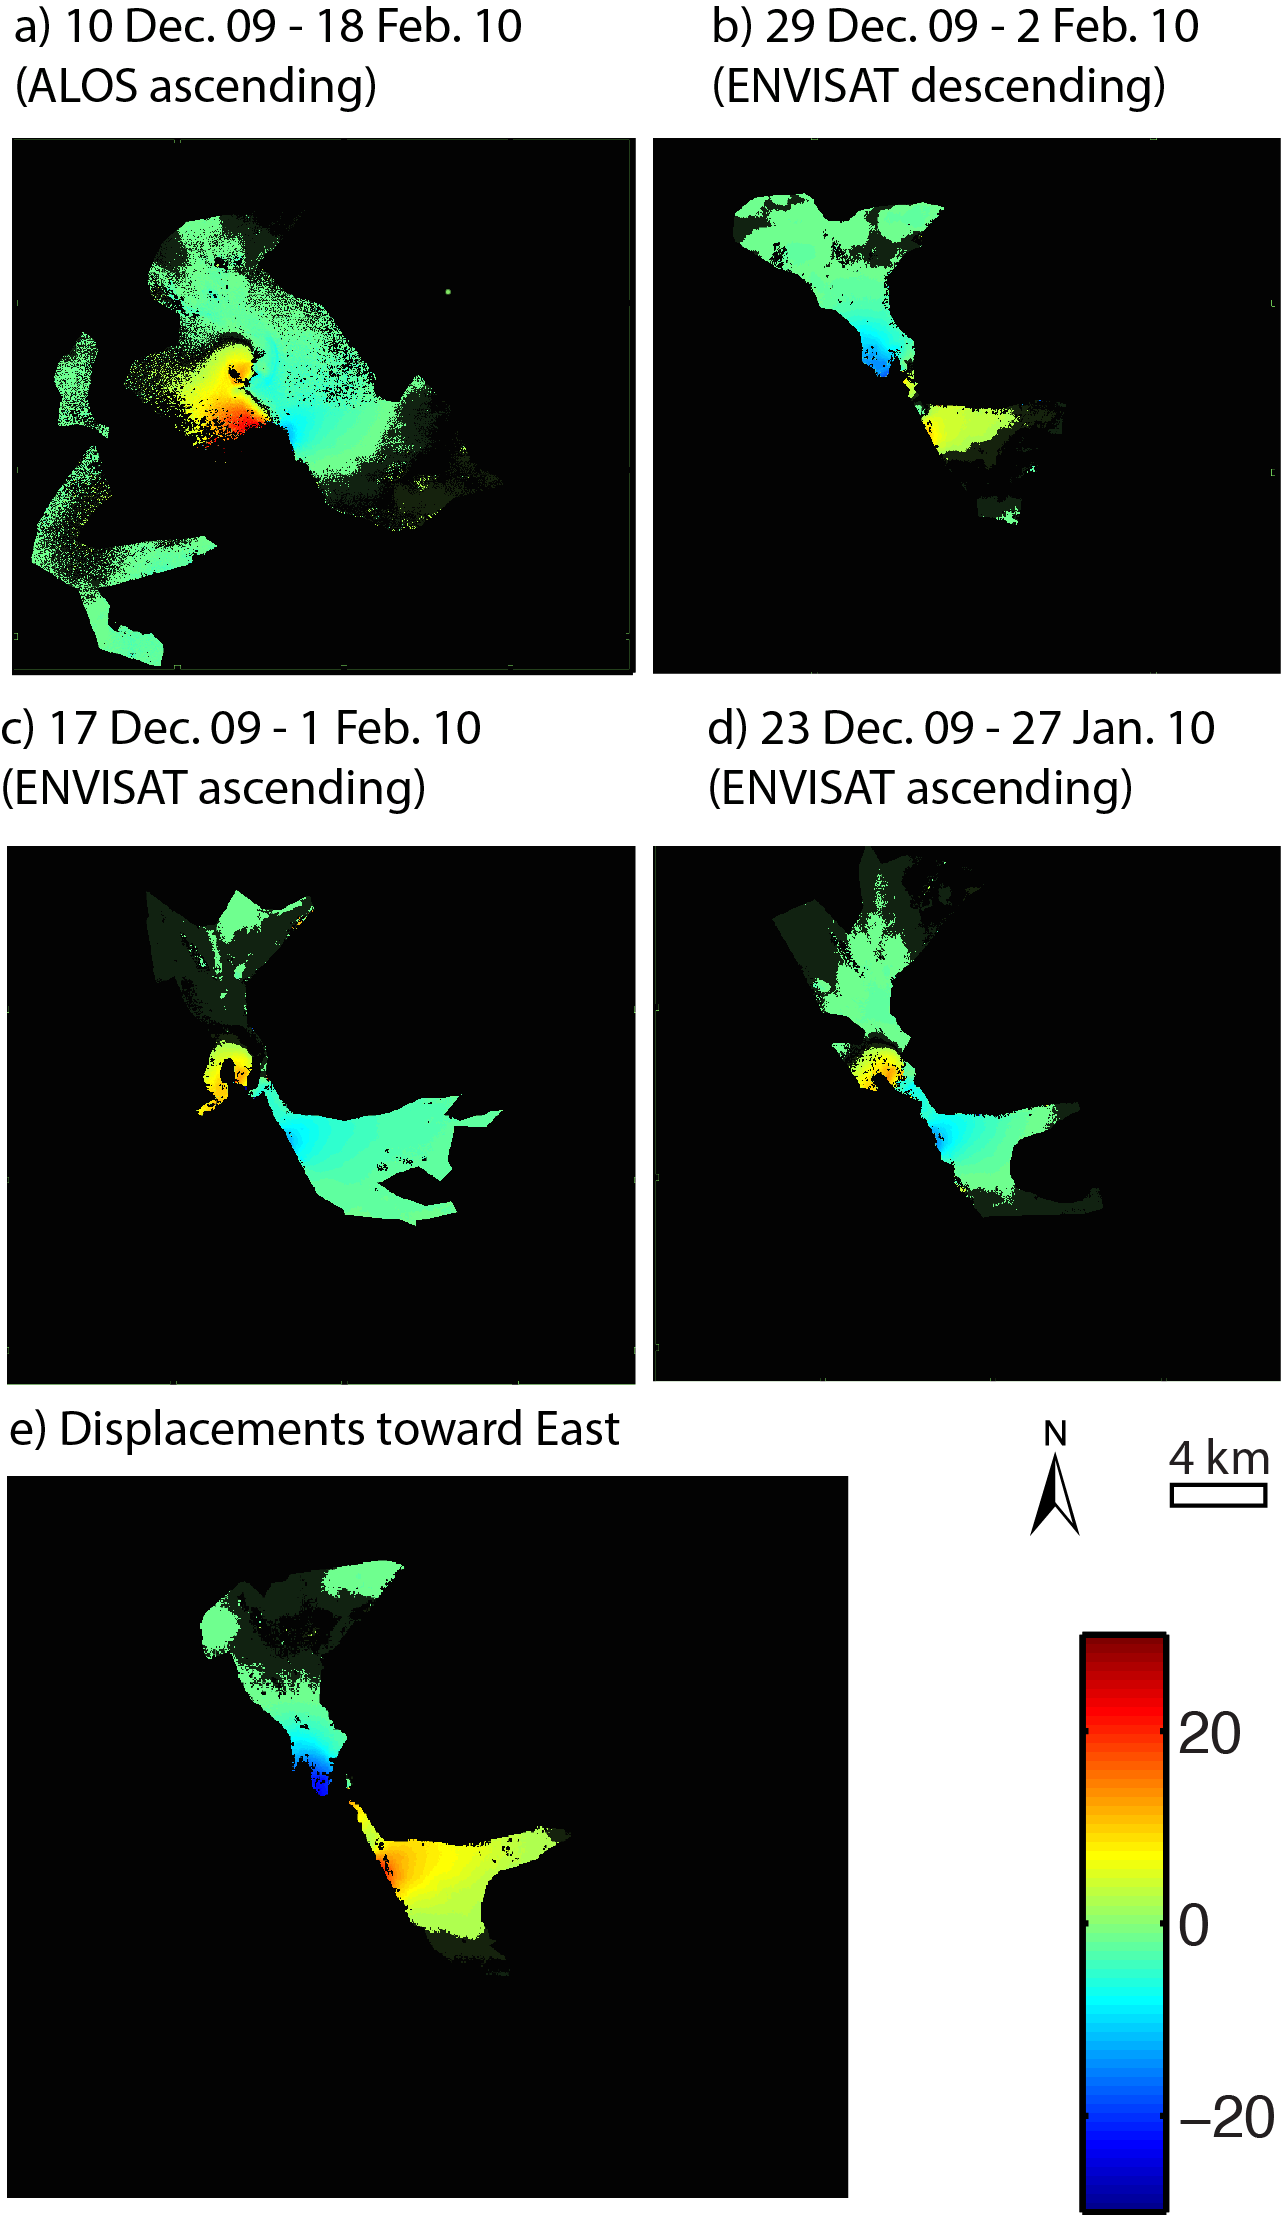


**Figure S2.** (**a**) Four selected interferograms covering all the phases and eruptive tremor of the 2010 eruption showing the deformations associated with the 2010 Nyamulagira eruption after unwrapping with SNAPHU. All displacements are in centimeters; (**b**) The InSAR displacements from the four beams were simultaneously used [28] to compute the horizontal displacements. The standard deviation is 1 cm on eastern displacements.


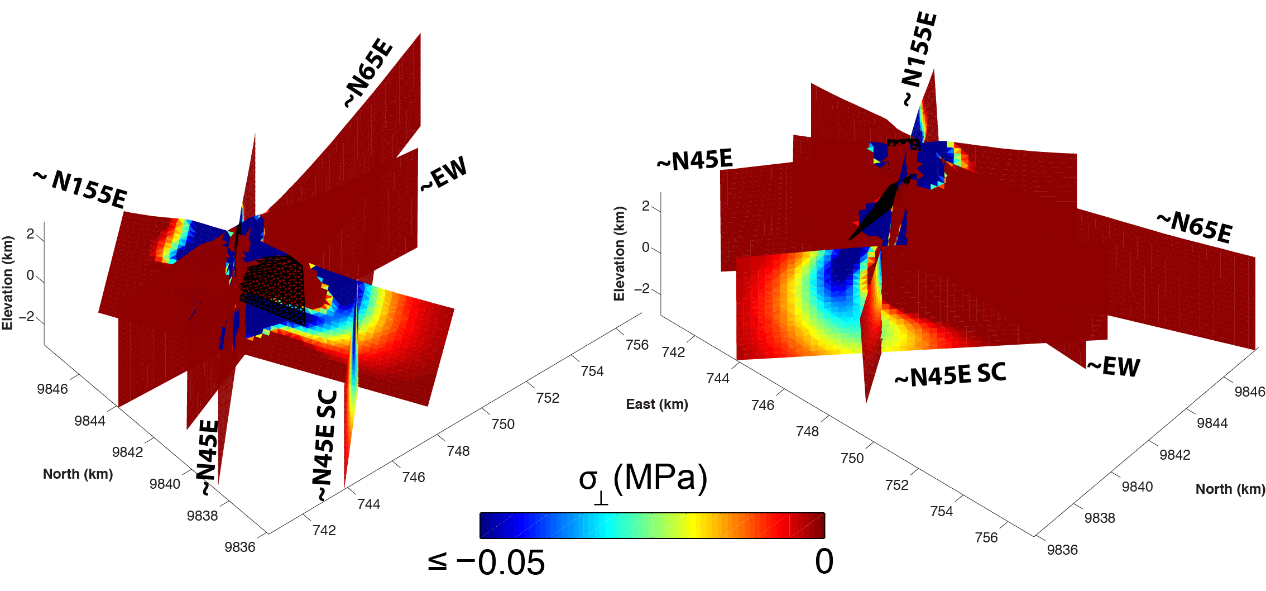


**Figure S3.** Changes in the normal stress on all the potential investigated Nyamulagira dike surfaces caused by the preferred modeled 2010 intrusions shown in Figure 3. The colorscale corresponds to normal stress change in MPa, with positive values (clamping) clipped to dark red and negative values corresponding to unclamping.

­­
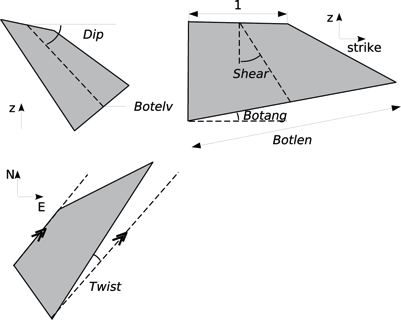


**Figure S4.** Modeling parameters for a dike that reaches the topography [30].


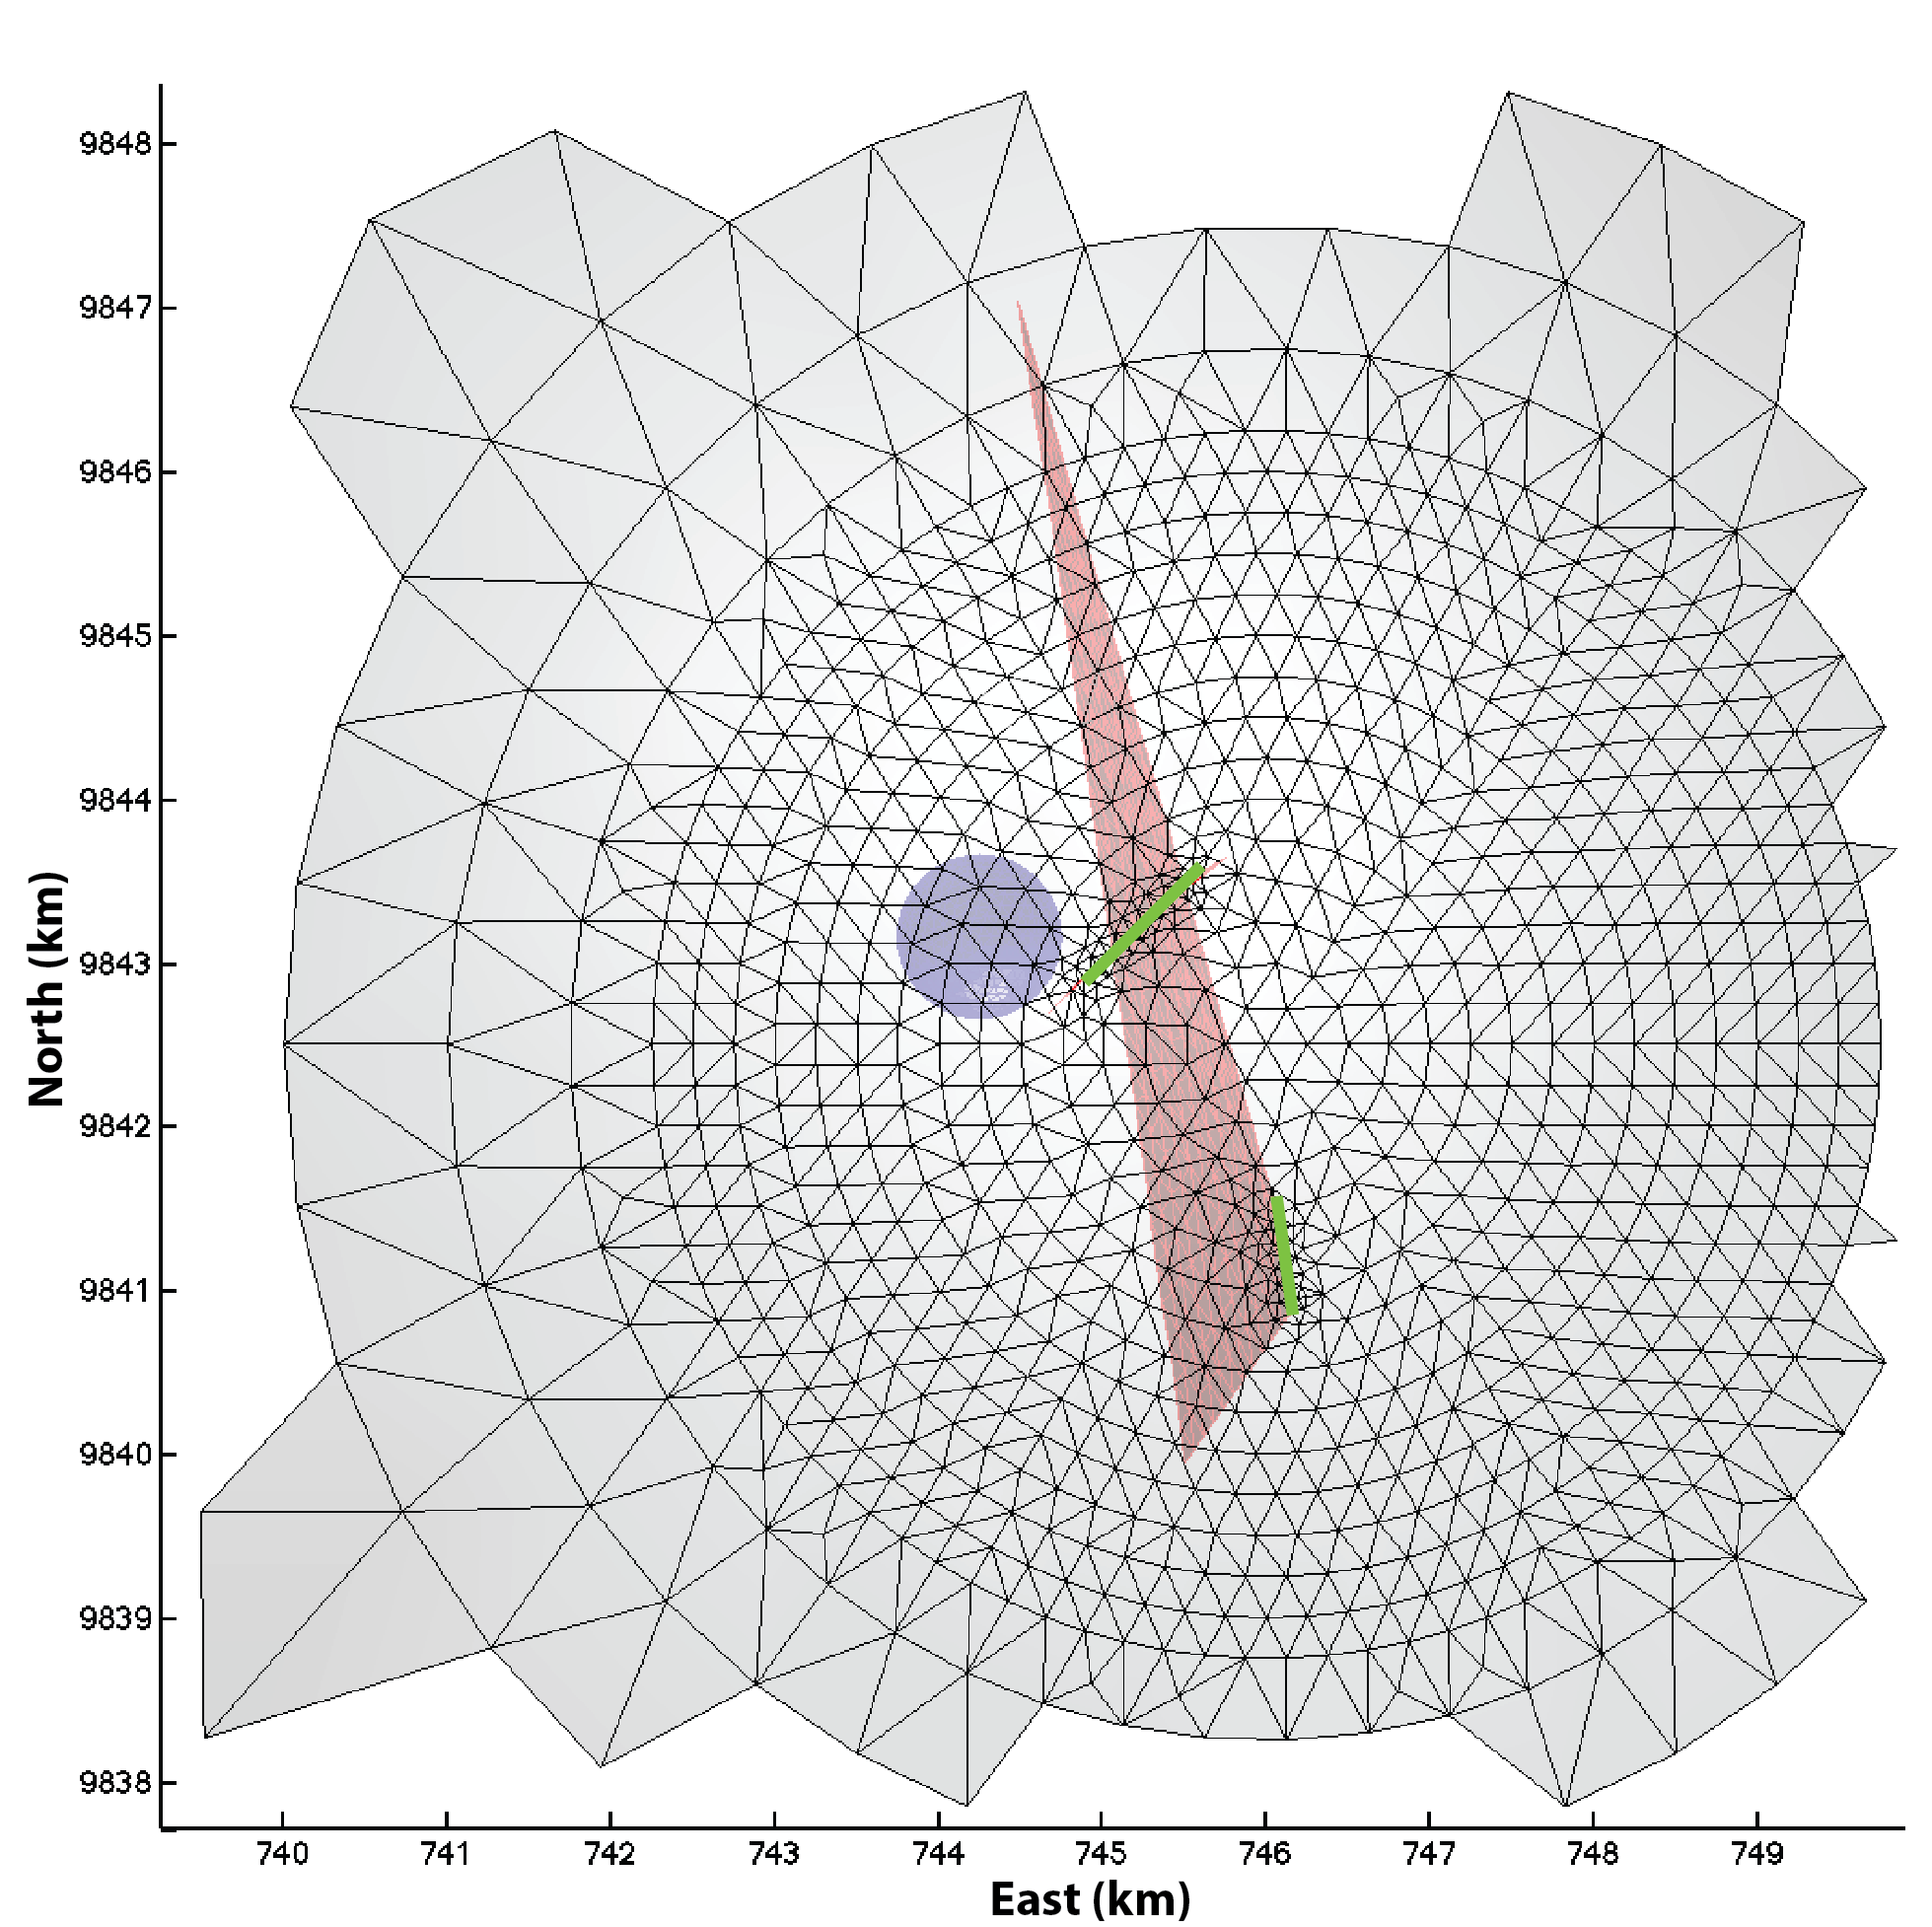


**Figure S5.** Close-up on the topographic mesh (based on the 30 meters resolution SRTM DEM) used for modeling of the 2010 eruption. Note that the radius of the entire topographic mesh is 30km to avoid edge effects [34]*.* The 2010 eruptive fissures, modeled magma reservoir and dikes are shown as bold green lines, blue and red, respectively.


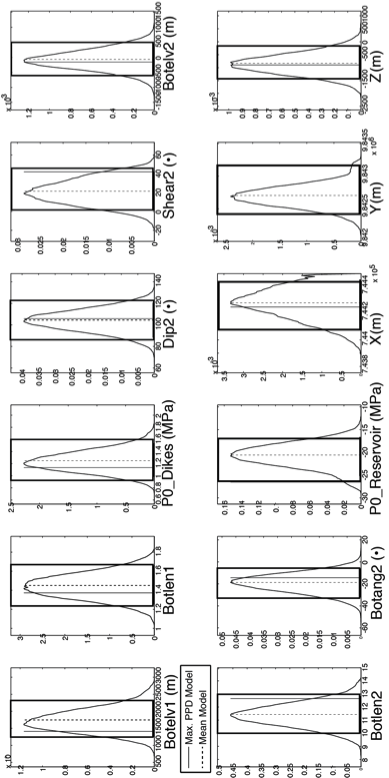


**Figure S6.** One-dimensional (curves) Marginal Posterior Probability Density Functions (PPDs) plotted with the best-fit (maximum PPD Model) and mean (Mean Model) models. The black bold outlined boxes show the 95% confidence intervals.


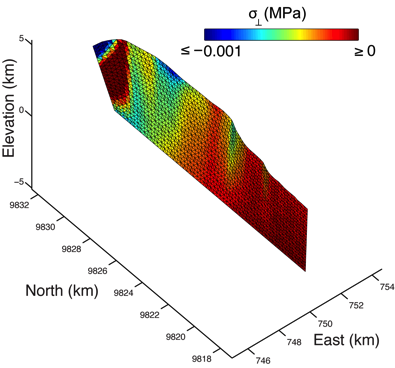


**Figure S7.** Changes in the normal stress on the potential Nyiragongo dike surface (Figure 1) caused by the preferred modeled 2010 intrusions shown in Figure 3. The colorscale corresponds to normal stress change in MPa, with positive values (clamping) clipped to dark red and negative values corresponding to unclamping.

**
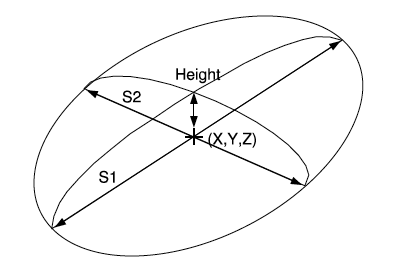
**

**Figure S8.** Modeling parameters for a laccolith [36].
